# Supplementary material for: Protein neddylation as a therapeutic target in pulmonary and extrapulmonary small cell carcinomas
Source: PubMed Central journal article supplement — Genes Dev. 2021 Jun;35(11-12):870–87. doi: 10.1101/gad.348316.121 (PMC8168556; doi:10.1101/gad.348316.121), 2021-06
Supplement: supp_gad.348316.121_SupplementalTable_S2.pdf [file supp_gad.348316.121_SupplementalTable_S2.pdf]

| <b><u>sgRNA</u></b>    | <b><u>Species</u></b> | <b><u>Guide Name</u></b>   | <b><u>Gene</u></b> |
|------------------------|-----------------------|----------------------------|--------------------|
| CGCTTCCGCGGCCCGTTCAA   | NonTargeting          | Cntrl1                     | NonTargeting       |
| CTAACAGCGCCGTTATCTAC   | NonTargeting          | Cntrl2                     | NonTargeting       |
| ATTTGAATGCTCCCGTCGAC   | NonTargeting          | Cntrl3                     | NonTargeting       |
| CCCTTCAGAACATCCTCATC   | Mouse                 | Cul2-1                     | <i>Cul2</i>        |
| ACCTCTCTATTTCCATAAG    | Mouse                 | Cul2-2                     | <i>Cul2</i>        |
| CCATGCAACCGTACACTCTT   | Mouse                 | Rbx1-1                     | <i>Rbx1</i>        |
| AACGAGGCAGGTGTGTCCGT   | Mouse                 | Rbx1-2                     | <i>Rbx1</i>        |
| CAGCAGCGGCTCATCTACAG   | Mouse                 | Nedd8-1                    | <i>Nedd8</i>       |
| CTCCTCTAAGAGCCAACACC   | Mouse                 | Nedd8-2                    | <i>Nedd8</i>       |
| CTCGGGGTTGCCGAAGTGCG   | Mouse                 | Insm1-1                    | <i>Insm1</i>       |
| AGTCCACGCCCGTGTCTTAC   | Mouse                 | Insm1-2                    | <i>Insm1</i>       |
| CGAAGCCGCTGAAGTTGAGC   | Mouse                 | Ascl1-1                    | <i>Ascl1</i>       |
| AACTGATGCGCTGCAAACGC   | Mouse                 | Ascl1-2                    | <i>Ascl1</i>       |
| AGGCAGCTTATCTTGAGTA    | Mouse                 | Rpia-1                     | <i>Rpia</i>        |
| ACCAGCGGTTGAAGCGCTCC   | Mouse                 | Bcl2l1-1                   | <i>Bcl2l1</i>      |
| GCGATGACTCCTACACCCCC   | Mouse                 | Cpox-1                     | <i>Cpox</i>        |
| ACCGACATACTTGAACCAAG   | Mouse                 | Cpox-2                     | <i>Cpox</i>        |
| ACGTCTGTCTGTACCAGCAT   | Human                 | CHUK                       | <i>CHUK</i>        |
| CTTGGGACCAGGCCGAGCTC   | Human                 | IRAK1                      | <i>IRAK1</i>       |
| ATGAGACAAAGCGCACATCG   | Human                 | MIOS                       | <i>MIOS</i>        |
| AGACTTACTTGAAGATTGCT   | Human                 | COPS4                      | <i>COPS4</i>       |
| <b><u>shRNA</u></b>    | <b><u>Species</u></b> | <b><u>Hairpin Name</u></b> | <b><u>Gene</u></b> |
| ACAACAGCCACAACGTCTATA  | Human                 | GFP                        | <i>GFP</i>         |
| GCTCATAATGAGGCATCATAT  | Human                 | NEDD8                      | <i>NEDD8</i>       |
| CTTCCCTGCTGTTACCTAAT   | Human                 | RBX1                       | <i>RBX1</i>        |
| CACGAGAAGCACAAAGTACTTC | Human                 | INSM1                      | <i>INSM1</i>       |
| GATTGATGGAATAGTTCATTT  | Human                 | COPS4-1                    | <i>COPS4</i>       |
| TGAAGATTGCTAGGCTATATC  | Human                 | COPS4-2                    | <i>COPS4</i>       |
